# Supplementary material for: Treating Parkinson’s Disease with Human Bone Marrow Mesenchymal Stem Cell Secretome: A Translational Investigation Using Human Brain Organoids and Different Routes of In Vivo Administration
Source: MDPI journal article supplement (doi:10.3390/cells12212565), 2023-11-02
Supplement: s1 [file s1]

Supplementary Data

Mendes-Pinheiro et al.

**Treating Parkinson's Disease with human Bone Marrow Mesenchymal Stem Cell Secretome: A translational investigation using human brain organoids and different routes of *in vivo* administration.**

Bárbara Mendes-Pinheiro<sup>1,2,‡</sup>, Jonas Campos<sup>1,2,‡</sup>, Ana Marote<sup>1,2</sup>, Carina Soares-Cunha<sup>1,2</sup>, Sarah L. Nickels<sup>3</sup>, Anna S. Monzel<sup>3</sup>, Jorge. R Cibrão<sup>1,2</sup>, Eduardo Loureiro-Campos<sup>1,2</sup>, Sofia C. Serra<sup>1,2</sup>, Sandra Barata-Antunes<sup>1,2</sup>, Sara Duarte-Silva<sup>1,2</sup>, Luísa Pinto<sup>1,2</sup>, Jens C. Schwamborn<sup>3\*</sup>, António J. Salgado<sup>1,2\*#</sup>

‡These authors are equally contributors.

\*These authors share senior co-authorship.

<sup>1</sup> Life and Health Sciences Research Institute (ICVS), School of Medicine, University of Minho, Campus de Gualtar, 4710-057 Braga, Portugal

<sup>2</sup> ICVS/3B's – PT Government Associate Laboratory, 4805-017 Guimarães, Portugal

<sup>3</sup> Luxembourg Centre for Systems and Biomedicine (LCSB), University of Luxembourg, L-4367 Belvaux, Luxembourg.

#Corresponding author: A. J. Salgado, PhD, Life and Health Sciences Research Institute (ICVS), School of Medicine, University of Minho, Campus de Gualtar, 4710-057 Braga, Portugal. E-mail: [asalgado@med.uminho.pt](mailto:asalgado@med.uminho.pt); Tel: +351 253 60 49 47; Fax: +351 253 60 48 20

\*These authors share senior co-authorship.

In order of appearance in the text

**a.**

| WT Name | Age of sampling | Sex | References                   | Database Number |
|---------|-----------------|-----|------------------------------|-----------------|
| K7      | 81              | F   | iPSCs Reinhardt et al., 2013 | 200             |
| T12     | 53              | F   | iPSCs Reinhardt et al., 2013 | 232             |
| COR     | 55              | M   | iPSCs Coriell GM23338        | 225             |

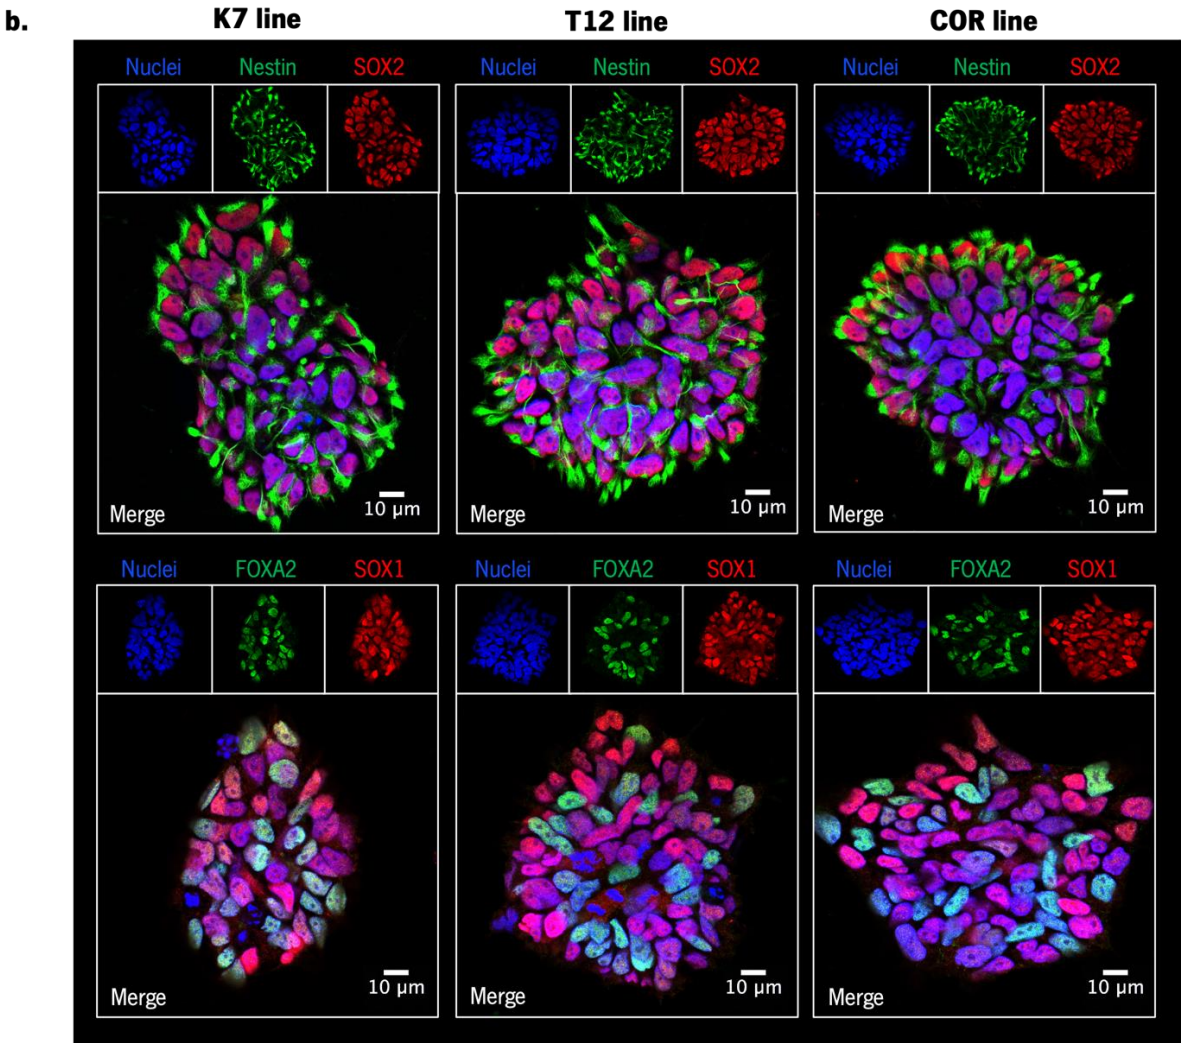

**Figure S1. Cell lines used in this study to generate hMOs (passage 14).** a) Donor characteristics of cell lines[1]. b) representative images of hvNESC morphology and expression of neuronal progenitor (Nestin, SOX1, and SOX2) and midbrain floorplate markers (FOXA2).

**Table S1. List of primary antibodies.**

| Antibody     | Specie  | Dilution | Source      | Reference |
|--------------|---------|----------|-------------|-----------|
| Dopamine     | rabbit  | 1:500    | ImmuSmol    | IS1005    |
| EN1          | goat    | 1:300    | Santa Cruz  | sc-46101  |
| FOXA2        | mouse   | 1:250    | Santa Cruz  | sc-101060 |
| GFAP         | chicken | 1:500    | Millipore   | AB5541    |
| GIRK2        | goat    | 1:200    | Abcam       | ab65096   |
| Nestin       | mouse   | 1:100    | Millipore   | MAB5326   |
| PAX6         | rabbit  | 1:300    | Covance     | PRB-278P  |
| SOX1         | goat    | 1:100    | R&D systems | AF3369    |
| SOX2         | goat    | 1:100    | R&D systems | AF2018    |
| S100 $\beta$ | mouse   | 1:100    | Sigma       | S2532     |
| TH           | chicken | 1:1000   | Abcam       | ab76442   |

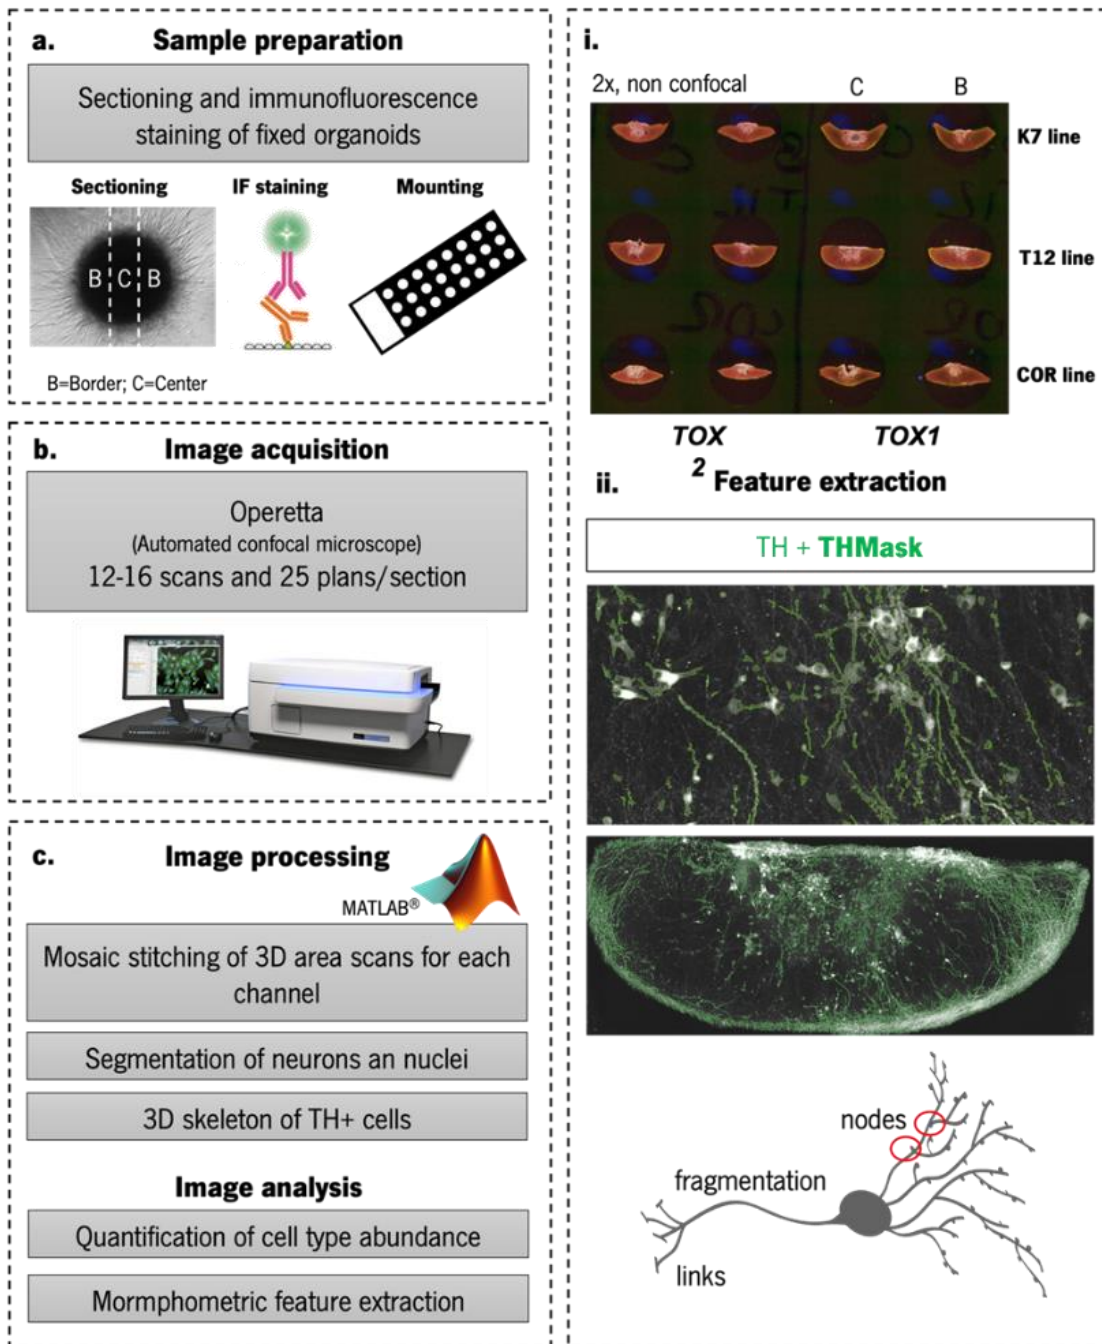

**Figure S2. High-content image analysis workflow.** a) sample preparation: organoids were sectioned and prior to immunofluorescence staining separated into border and center sections. Organoid sections were mounted on an object slide containing a grid for automated image acquisition; b) image acquisition: 12-16 area scans in 25 planes were acquired using an automated confocal microscope (operetta); c) images were exported in MATLAB and area scans were stitched. On the obtained 3D image, masks were generated for dopaminergic neurons in order to quantify cell type abundance and morphometric features; i) 2x non confocal image representation of organoid slices; ii) feature extraction:

Dopaminergic neuronal complexity was quantified by extracting cellular features such as TH mask, neurite nodes, links, and fragmentation. Adapted from (Monzel et al., 2020) [3].

| Feature            | Description                                                                                                                                                                                            |
|--------------------|--------------------------------------------------------------------------------------------------------------------------------------------------------------------------------------------------------|
| Nuclei mask        | Count of nuclear positive pixels                                                                                                                                                                       |
| Nuclei dead mask   | Count of nuclear dead pixels                                                                                                                                                                           |
| Nuclei dead/nuclei | Count of nuclear dead pixels / Hoechst                                                                                                                                                                 |
| TUJ1 mask          | Count of TUJ1 mask pixels                                                                                                                                                                              |
| TUJ1+/Nuclei       | Sum of TUJ1+ pixels / Hoechst                                                                                                                                                                          |
| MAP2 mask          | Count of MAP2 mask pixels                                                                                                                                                                              |
| MAP2+/Nuclei       | Sum of MAP2+ pixels / Hoechst                                                                                                                                                                          |
| TH mask            | Count of TH mask pixels                                                                                                                                                                                |
| TH+/Nuclei         | Sum of TH+ pixels / Hoechst                                                                                                                                                                            |
| TH percentage      | Percentage of TH+ cells in the perinuclear zone of segmented nuclei                                                                                                                                    |
| TH skeleton        | Count of TH skeleton pixel (red). Skeleton is calculated using a thinning function resulting in a simplified representation of the neuronal branching. The skeleton allows identifying nodes and links |
| Nodes              | Total number of points located at a bifurcation of neuronal branching (red points), generated from the TH skeleton                                                                                     |
| Links              | Total number of connecting segments originated from the nodes (red lines), generated from the TH skeleton                                                                                              |

Table S2. Features from image analysis (adapted from (Smits et al., 2019))[2].

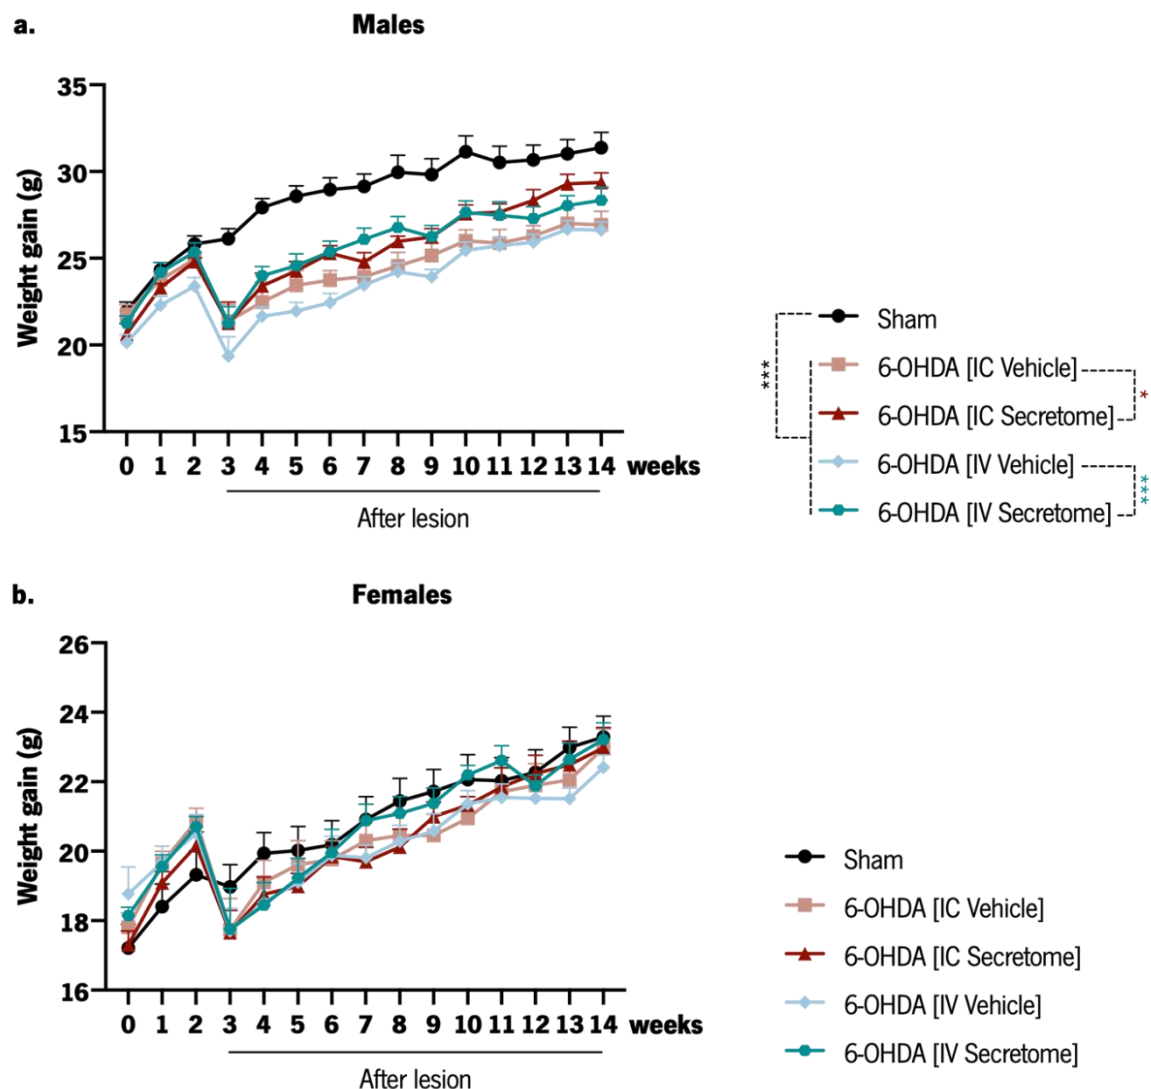

**Figure S3. Weight gain throughout the study.** Significant differences were found in the weight gain in males after lesion (Sham vs 6-OHDA-lesioned animals), and after treatments; b) No significant differences were found in the weight gain for females. These results did not interfere with the motor performance of the animals on the different tasks, as observed



by using the bodyweight as co-variable or splitting the data by sex (data not shown). n[males] = 6-9/ n[females] = 6-8 for each group used. Statistical summary in Table S1. Data are presented as mean  $\pm$  SEM. \*p < 0.05, \*\*\*p < 0.001.

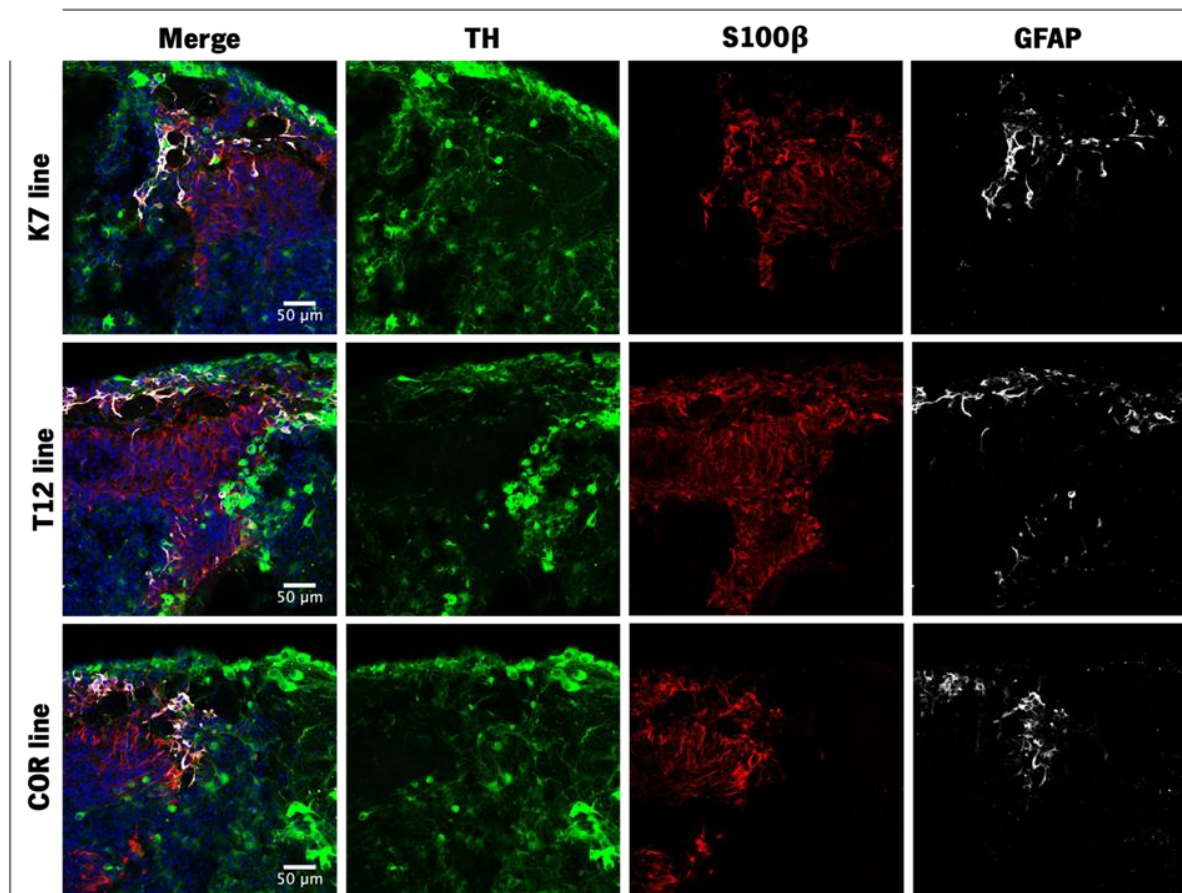

**Figure S4. Characterization of glial differentiation at day 30 of the differentiation protocol.** Immunofluorescence staining for astrocytic markers S100β (red) and GFAP (white).



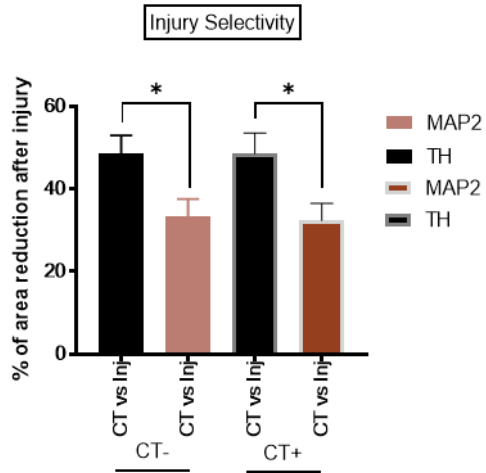

**Figure S5. Selectivity of 6-OHDA-induced degeneration in neuronal populations.** Measurements of area marker (TH or MAP2) reduction after injury demonstrate a higher degree of degeneration of the dopaminergic cell population. Data are presented as mean  $\pm$  SEM.  $n=24$ . Unpaired T-test; CT- (TH vs MAP2 Cohen's  $d=0.774$ ); CT+ (TH vs MAP2 Cohen's  $d=0.718$ ).  $*p < 0.05$ .

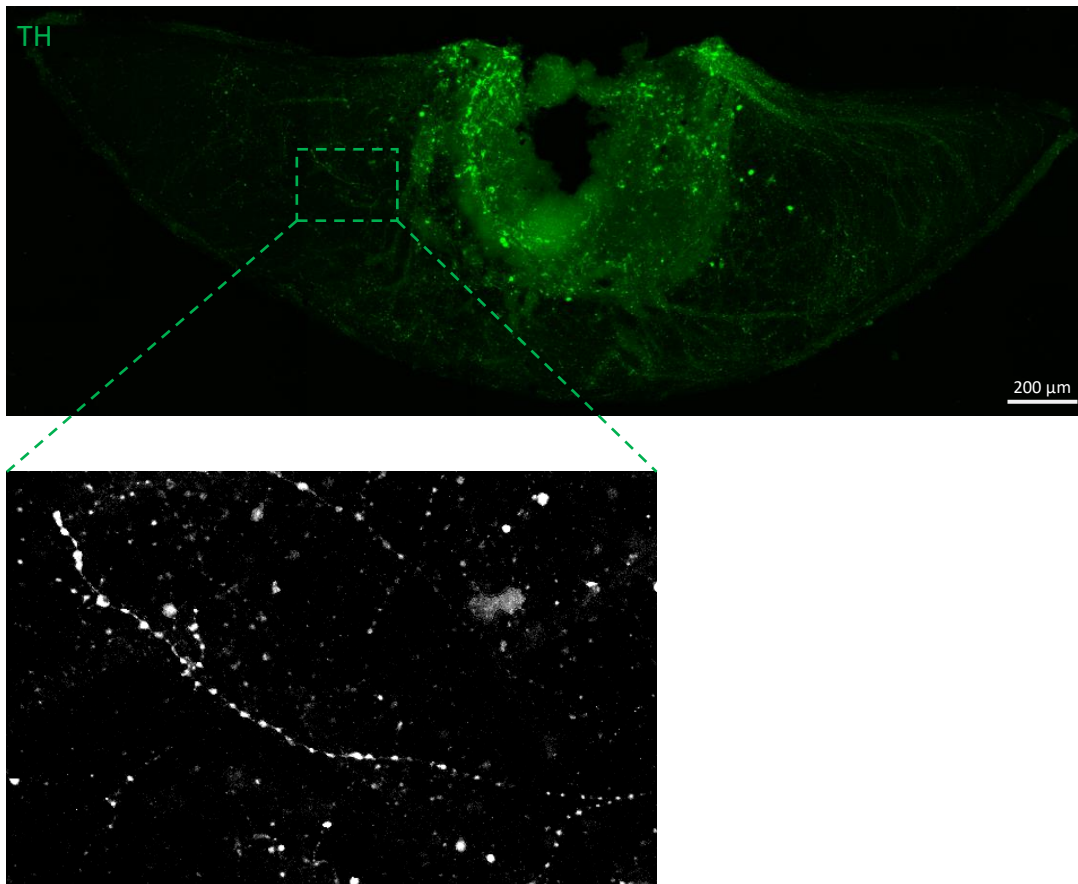

**Figure S6. Example of a fragmented neurite after 6-OHDA treatment.** It is possible to observe a clearly beaded and broken fiber marked with TH in the hMO exposed to the neurotoxin.

| Measure                            | Statistical Report                                          | *Effect size (weeks after treatments)          |
|------------------------------------|-------------------------------------------------------------|------------------------------------------------|
| <b>Rotameter test</b>              |                                                             |                                                |
| <i>Net-contralateral rotations</i> | U=0, $p < 0.001$                                            | -                                              |
| <b>Motor swimming test</b>         | Time: $F_{(2.67, 176.1)} = 90.72$ , $p < 0.001$             | <b>1 week</b>                                  |
|                                    | Group: $F_{(4, 68)} = 10.91$ , $p < 0.001$                  | IC Vehicle vs IC Secretome: Cohen's $d = 0.37$ |
|                                    | Time x Group: $F_{(12, 199)} = 5.12$ , $p < 0.001$          | IV Vehicle vs IV Secretome: Cohen's $d = 1.3$  |
|                                    | <b>Multiple comparisons</b>                                 |                                                |
|                                    | Sham vs 6-OHDA [IC Vehicle]: $p < 0.001$                    | <b>4 weeks</b>                                 |
|                                    | Sham vs 6-OHDA [IC Secretome]: $p < 0.001$                  | IC Vehicle vs IC Secretome: Cohen's $d = 0.97$ |
|                                    | Sham vs 6-OHDA [IV Vehicle]: $p < 0.001$                    | IV Vehicle vs IV Secretome: Cohen's $d = 1.03$ |
|                                    | Sham vs 6-OHDA [IV Secretome]: $p < 0.001$                  | <b>7 week</b>                                  |
|                                    | 6-OHDA [IC Vehicle] vs 6-OHDA [IC Secretome]: $p = 0.180$   | IC Vehicle vs IC Secretome: Cohen's $d = 0.96$ |
|                                    | 6-OHDA [IV Vehicle] vs 6-OHDA [IV Secretome]: $p = 0.002$   | IV Vehicle vs IV Secretome: Cohen's $d = 1.46$ |
| <i>Latency (s)</i>                 | 6-OHDA [IC Secretome] vs 6-OHDA [IV Secretome]: $p = 0.655$ |                                                |

|                                                           |                                                           |                                                |
|-----------------------------------------------------------|-----------------------------------------------------------|------------------------------------------------|
| <b>Pole test</b><br><br><i>Time to reach the cage (s)</i> | Time: $F_{(3, 201)} = 19.57, p < 0.001$                   | <b>1 week</b>                                  |
|                                                           | Group: $F_{(4, 69)} = 9.92, p < 0.001$                    | IC Vehicle vs IC Secretome: Cohen's $d = 0.71$ |
|                                                           | Time x Group: $F_{(12, 201)} = 5.03, p < 0.001$           |                                                |
|                                                           | <b>Multiple comparisons</b>                               | IV Vehicle vs IV Secretome: Cohen's $d = 0.94$ |
|                                                           | Sham vs 6-OHDA [IC Vehicle]: $p < 0.001$                  | <b>4 weeks</b>                                 |
|                                                           | Sham vs 6-OHDA [IC Secretome]: $p = 0.014$                | IC Vehicle vs IC Secretome: Cohen's $d = 0.64$ |
|                                                           | Sham vs 6-OHDA [IV Vehicle]: $p < 0.001$                  |                                                |
|                                                           | Sham vs 6-OHDA [IV Secretome]: $p = 0.047$                | IV Vehicle vs IV Secretome: Cohen's $d = 0.92$ |
|                                                           | 6-OHDA [IC Vehicle] vs 6-OHDA [IC Secretome]: $p = 0.378$ | <b>7 week</b>                                  |
|                                                           | 6-OHDA [IV Vehicle] vs 6-OHDA [IV Secretome]: $p = 0.025$ | IC Vehicle vs IC Secretome: Cohen's $d = 0.90$ |
| <b>Beam balance walk test</b><br><br><i>Latency (s)</i>   | Time: $F_{(2.53, 159.1)} = 19.70, p < 0.001$              | <b>1 week</b>                                  |
|                                                           | Group: $F_{(4, 70)} = 8.90, p < 0.001$                    | IC Vehicle vs IC Secretome: Cohen's $d = 0.53$ |
|                                                           | Time x Group: $F_{(12, 189)} = 2.25, p < 0.05$            |                                                |
|                                                           | <b>Multiple comparisons</b>                               | IV Vehicle vs IV Secretome: Cohen's $d = 0.68$ |
|                                                           | Sham vs 6-OHDA [IC Vehicle]: $p < 0.001$                  | <b>4 weeks</b>                                 |
|                                                           | Sham vs 6-OHDA [IC Secretome]: $p < 0.001$                | IC Vehicle vs IC Secretome: Cohen's $d = 0.05$ |
|                                                           | Sham vs 6-OHDA [IV Vehicle]: $p < 0.001$                  |                                                |
|                                                           | Sham vs 6-OHDA [IV Secretome]: $p = 0.0034$               | IV Vehicle vs IV Secretome: Cohen's $d = 0.56$ |
|                                                           | 6-OHDA [IC Vehicle] vs 6-OHDA [IC Secretome]: $p = 0.681$ | <b>7 week</b>                                  |
|                                                           | 6-OHDA [IV Vehicle] vs 6-OHDA [IV Secretome]: $p = 0.008$ | IC Vehicle vs IC Secretome: Cohen's $d = 0.50$ |
| <b>TH+ labelling</b><br><br><i>Dorsal striatum</i>        | Time: $F_{(4, 30)} = 49.71, p < 0.001$                    | IC Vehicle vs IC Secretome: Cohen's $d = 2.9$  |
|                                                           | <b>Multiple comparisons</b>                               |                                                |
|                                                           | Sham vs 6-OHDA [IC Vehicle]: $p < 0.001$                  | IV Vehicle vs IV Secretome: Cohen's $d = 1.5$  |
|                                                           | Sham vs 6-OHDA [IC Secretome]: $p < 0.001$                |                                                |

|                                    |                                                                                                                                                                                                                                                                                                                                                                                                                                                                                                                                                                                                                                                                                                                                                                                         |                                                                                                                                  |
|------------------------------------|-----------------------------------------------------------------------------------------------------------------------------------------------------------------------------------------------------------------------------------------------------------------------------------------------------------------------------------------------------------------------------------------------------------------------------------------------------------------------------------------------------------------------------------------------------------------------------------------------------------------------------------------------------------------------------------------------------------------------------------------------------------------------------------------|----------------------------------------------------------------------------------------------------------------------------------|
|                                    | <p>Sham vs 6-OHDA [IV Vehicle]: <math>p &lt; 0.001</math></p> <p>Sham vs 6-OHDA [IV Secretome]: <math>p &lt; 0.001</math></p> <p>6-OHDA [IC Vehicle] vs 6-OHDA [IC Secretome]: <math>p &lt; 0.001</math></p> <p>6-OHDA [IV Vehicle] vs 6-OHDA [IV Secretome]: <math>p = 0.049</math></p> <p>6-OHDA [IC Secretome] vs 6-OHDA [IV Secretome]: <math>p = 0.026</math></p>                                                                                                                                                                                                                                                                                                                                                                                                                  |                                                                                                                                  |
| <b>TH+ cells</b><br><i>SNpc</i>    | <p>Time: <math>F_{(4, 30)} = 60.92</math>, <math>p &lt; 0.001</math></p> <hr/> <p><b>Multiple comparisons</b></p> <p>Sham vs 6-OHDA [IC Vehicle]: <math>p &lt; 0.001</math></p> <p>Sham vs 6-OHDA [IC Secretome]: <math>p &lt; 0.001</math></p> <p>Sham vs 6-OHDA [IV Vehicle]: <math>p &lt; 0.001</math></p> <p>Sham vs 6-OHDA [IV Secretome]: <math>p &lt; 0.001</math></p> <p>6-OHDA [IC Vehicle] vs 6-OHDA [IC Secretome]: <math>p = 0.005</math></p> <p>6-OHDA [IV Vehicle] vs 6-OHDA [IV Secretome]: <math>p = 0.370</math></p> <p>6-OHDA [IC Secretome] vs 6-OHDA [IV Secretome]: <math>p = 0.127</math></p>                                                                                                                                                                     | <p>IC Vehicle vs IC Secretome: Cohen's <math>d = 1.7</math></p> <p>IV Vehicle vs IV Secretome: Cohen's <math>d = 1.17</math></p> |
| <b>Weight gain</b><br><i>Males</i> | <p>Time: <math>F_{(3.35, 111.9)} = 136.5</math>, <math>p &lt; 0.001</math></p> <p>Group: <math>F_{(4, 34)} = 12.18</math>, <math>p &lt; 0.001</math></p> <p>Time x Group: <math>F_{(56, 468)} = 3.14</math>, <math>p &lt; 0.001</math></p> <hr/> <p><b>Multiple comparisons</b></p> <p>Sham vs 6-OHDA [IC Vehicle]: <math>p &lt; 0.001</math></p> <p>Sham vs 6-OHDA [IC Secretome]: <math>p &lt; 0.001</math></p> <p>Sham vs 6-OHDA [IV Vehicle]: <math>p &lt; 0.001</math></p> <p>Sham vs 6-OHDA [IV Secretome]: <math>p &lt; 0.001</math></p> <p>6-OHDA [IC Vehicle] vs 6-OHDA [IC Secretome]: <math>p = 0.03</math></p> <p>6-OHDA [IV Vehicle] vs 6-OHDA [IV Secretome]: <math>p &lt; 0.001</math></p> <p>6-OHDA [IC Secretome] vs 6-OHDA [IV Secretome]: <math>p = 0.998</math></p> | -                                                                                                                                |

|                                                                                    |                                                             |
|------------------------------------------------------------------------------------|-------------------------------------------------------------|
| <b>Weight gain</b><br><br><i>Females</i>                                           | Time: $F_{(3,67, 113.6)} = 121.8$ , $p < 0.001$             |
|                                                                                    | Group: $F_{(4, 32)} = 0.264$ , $p = 0.899$                  |
|                                                                                    | Time x Group: $F_{(56, 434)} = 2.32$ , $p < 0.001$          |
|                                                                                    | <b>Multiple comparisons</b>                                 |
|                                                                                    | Sham vs 6-OHDA [IC Vehicle]: $p = 0.739$                    |
|                                                                                    | Sham vs 6-OHDA [IC Secretome]: $p = 0.287$                  |
|                                                                                    | Sham vs 6-OHDA [IV Vehicle]: $p = 0.400$                    |
|                                                                                    | Sham vs 6-OHDA [IV Secretome]: $p = 0.983$                  |
|                                                                                    | 6-OHDA [IC Vehicle] vs 6-OHDA [IC Secretome]: $p = 0.927$   |
|                                                                                    | 6-OHDA [IV Vehicle] vs 6-OHDA [IV Secretome]: $p = 0.730$   |
|                                                                                    | 6-OHDA [IC Secretome] vs 6-OHDA [IV Secretome]: $p = 0.581$ |
| <b>Horizontal spontaneous activity</b><br><br><i>Nr of squares traveled (1min)</i> | <b>After Lesion:</b> $\chi^2 = 23.93$ , $p < 0.001$         |
|                                                                                    | <b>After treatments</b>                                     |
|                                                                                    | <b>1 week:</b> $\chi^2 = 1.92$ , $p = 0.7512$               |
|                                                                                    | <b>4 weeks:</b> $\chi^2 = 8.14$ , $p = 0.087$               |
|                                                                                    | <b>7 weeks:</b> $\chi^2 = 9.12$ , $p = 0.058$               |
| <b>Gait quality</b>                                                                | <b>After Lesion:</b> $\chi^2 = 7.91$ , $p = 0.095$          |
|                                                                                    | <b>After treatments</b>                                     |
|                                                                                    | <b>1 week:</b> $\chi^2 = 6.71$ , $p = 0.152$                |
|                                                                                    | <b>4 weeks:</b> $\chi^2 = 8.36$ , $p = 0.079$               |
|                                                                                    | <b>7 weeks:</b> $\chi^2 = 12.00$ , $p = 0.017$              |
| <b>Hindlimb tonus</b><br><br><i>Left paw</i>                                       | <b>After Lesion:</b> $\chi^2 = 6.79$ , $p = 0.148$          |
|                                                                                    | <b>After treatments</b>                                     |
|                                                                                    | <b>1 week:</b> $\chi^2 = 13.00$ , $p = 0.011$               |
|                                                                                    | <b>4 weeks:</b> $\chi^2 = 14.28$ , $p = 0.007$              |
|                                                                                    | <b>7 weeks:</b> $\chi^2 = 13.54$ , $p = 0.0089$             |

Table S3. Statistical report for the in vivo study.

## References

1. Reinhardt, P.; Glatza, M.; Hemmer, K.; Tsytsyura, Y.; Thiel, C.S.; Höing, S.; Moritz, S.; Parga, J.A.; Wagner, L.; Bruder, J.M.; et al. Derivation and Expansion Using Only Small Molecules of Human Neural Progenitors for Neurodegenerative Disease Modeling. *PLoS ONE* **2013**, *8*, e59252, doi:10.1371/journal.pone.0059252.
2. Smits, L.M.; Reinhardt, L.; Reinhardt, P.; Glatza, M.; Monzel, A.S.; Stanslowsky, N.; Rosato-Siri, M.D.; Zanon, A.; Antony, P.M.; Bellmann, J.; et al. Modeling Parkinson's Disease in Midbrain-like Organoids. *npj Parkinson's Disease* **2019**, *5*, 5, doi:10.1038/s41531-019-0078-4.
3. Monzel, A.S.; Hemmer, K.; Kaoma, T.; Smits, L.M.; Bolognin, S.; Lucarelli, P.; Rosety, I.; Zagare, A.; Antony, P.; Nickels, S.L.; et al. Machine Learning-Assisted Neurotoxicity Prediction in Human Midbrain Organoids. *Parkinsonism & Related Disorders* **2020**, *75*, 105–109, doi:10.1016/j.parkreldis.2020.05.011.
